# Supplementary material for: Organocatalytic asymmetric arylation of indoles enabled by azo groups
Source: Springer Nature journal article supplement (doi:10.1038/nchem.2866), 2017-10-02
Supplement: 41557_2018_BFnchem2866_MOESM177_ESM.mol [file 41557_2018_BFnchem2866_MOESM177_ESM.mol]

nchem.2866-comp3o.mol
  ChemDraw09121711132D

 31 34  0  0  1  0  0  0  0  0999 V2000
   -2.5277   -0.7903    0.0000 C   0  0  0  0  0  0  0  0  0  0  0  0
   -2.5277   -1.6153    0.0000 C   0  0  0  0  0  0  0  0  0  0  0  0
   -1.0988   -1.6153    0.0000 C   0  0  0  0  0  0  0  0  0  0  0  0
   -1.0988   -0.7903    0.0000 C   0  0  0  0  0  0  0  0  0  0  0  0
   -1.8133   -0.3778    0.0000 C   0  0  0  0  0  0  0  0  0  0  0  0
   -0.3142   -1.8702    0.0000 N   0  0  0  0  0  0  0  0  0  0  0  0
    0.1708   -1.2028    0.0000 C   0  0  0  0  0  0  0  0  0  0  0  0
   -0.3142   -0.5354    0.0000 C   0  0  0  0  0  0  0  0  0  0  0  0
    0.9929   -1.2028    0.0000 C   0  0  0  0  0  0  0  0  0  0  0  0
   -2.4661    1.6139    0.0000 C   0  0  0  0  0  0  0  0  0  0  0  0
   -2.4661    0.7889    0.0000 C   0  0  0  0  0  0  0  0  0  0  0  0
   -1.7516    0.3764    0.0000 C   0  0  0  0  0  0  0  0  0  0  0  0
   -1.0372    0.7889    0.0000 C   0  0  0  0  0  0  0  0  0  0  0  0
   -1.0372    1.6139    0.0000 C   0  0  0  0  0  0  0  0  0  0  0  0
   -1.7516    2.0264    0.0000 C   0  0  0  0  0  0  0  0  0  0  0  0
   -0.3227    0.3764    0.0000 C   0  0  0  0  0  0  0  0  0  0  0  0
    0.3918    0.7889    0.0000 C   0  0  0  0  0  0  0  0  0  0  0  0
    0.3918    1.6139    0.0000 C   0  0  0  0  0  0  0  0  0  0  0  0
   -0.3227    2.0264    0.0000 C   0  0  0  0  0  0  0  0  0  0  0  0
    1.1038    0.3778    0.0000 N   0  0  0  0  0  0  0  0  0  0  0  0
    1.8157    0.7889    0.0000 N   0  0  0  0  0  0  0  0  0  0  0  0
    1.4040   -0.4908    0.0000 C   0  0  0  0  0  0  0  0  0  0  0  0
    1.4040   -1.9148    0.0000 C   0  0  0  0  0  0  0  0  0  0  0  0
    1.9010   -1.2028    0.0000 C   0  0  0  0  0  0  0  0  0  0  0  0
   -3.2397   -0.3792    0.0000 Cl  0  0  0  0  0  0  0  0  0  0  0  0
   -1.8157   -2.0264    0.0000 C   0  0  0  0  0  0  0  0  0  0  0  0
    2.5277    0.3778    0.0000 C   0  0  0  0  0  0  0  0  0  0  0  0
    3.2397    0.7889    0.0000 O   0  0  0  0  0  0  0  0  0  0  0  0
    2.5277   -0.4443    0.0000 O   0  0  0  0  0  0  0  0  0  0  0  0
    3.2397   -0.8554    0.0000 C   0  0  0  0  0  0  0  0  0  0  0  0
   -3.1781    2.0249    0.0000 C   0  0  0  0  0  0  0  0  0  0  0  0
 21 27  1  0      
 27 28  2  0      
 27 29  1  0      
 29 30  1  0      
 10 31  1  0      
  1  2  2  0      
  3  4  1  0      
  4  5  2  0      
  5  1  1  1      
  3  6  1  0      
  6  7  1  0      
  7  8  2  0      
  8  4  1  0      
  7  9  1  0      
 10 11  2  0      
 11 12  1  0      
 12 13  2  0      
 13 14  1  0      
 14 15  2  0      
 15 10  1  0      
 13 16  1  0      
 16 17  2  0      
 17 18  1  1      
 18 19  2  0      
 19 14  1  0      
 17 20  1  0      
 20 21  1  0      
  9 22  1  0      
  9 23  1  0      
  9 24  1  0      
 16  8  1  0      
  1 25  1  0      
  2 26  1  1      
  3 26  2  0      
M  STY  1   1 SUP
M  SLB  1   1   1
M  SAL   1  4  27  28  29  30
M  SBL   1  1   1
M  SMT   1 CO2Me
M  SBV   1   1   -0.7120    0.4111
M  STY  1   2 SUP
M  SLB  1   2   2
M  SAL   2  1  31
M  SBL   2  1   5
M  SMT   2 ^Me
M  SBV   2   5    0.7120   -0.4111
M  END
