# Supplementary material for: Organocatalytic asymmetric arylation of indoles enabled by azo groups
Source: Springer Nature journal article supplement (doi:10.1038/nchem.2866), 2017-10-02
Supplement: 41557_2018_BFnchem2866_MOESM282_ESM.mol [file 41557_2018_BFnchem2866_MOESM282_ESM.mol]

nchem.2866-comp5d.mol
  ChemDraw09121711132D

 32 37  0  0  1  0  0  0  0  0999 V2000
   -2.6712    1.3843    0.0000 C   0  0  0  0  0  0  0  0  0  0  0  0
   -3.1561    0.7169    0.0000 C   0  0  0  0  0  0  0  0  0  0  0  0
   -2.8206   -0.0368    0.0000 C   0  0  0  0  0  0  0  0  0  0  0  0
   -2.0001   -0.1230    0.0000 C   0  0  0  0  0  0  0  0  0  0  0  0
   -1.5151    0.5444    0.0000 C   0  0  0  0  0  0  0  0  0  0  0  0
   -1.8507    1.2981    0.0000 C   0  0  0  0  0  0  0  0  0  0  0  0
   -1.5151   -0.7905    0.0000 N   0  0  0  0  0  0  0  0  0  0  0  0
   -0.7305   -0.5355    0.0000 C   0  0  0  0  0  0  0  0  0  0  0  0
   -0.7305    0.2895    0.0000 C   0  0  0  0  0  0  0  0  0  0  0  0
    0.0541   -0.7905    0.0000 N   0  0  0  0  0  0  0  0  0  0  0  0
    0.5390   -0.1230    0.0000 C   0  0  0  0  0  0  0  0  0  0  0  0
    0.0541    0.5444    0.0000 C   0  0  0  0  0  0  0  0  0  0  0  0
    1.3595   -0.0368    0.0000 C   0  0  0  0  0  0  0  0  0  0  0  0
    1.6951    0.7169    0.0000 C   0  0  0  0  0  0  0  0  0  0  0  0
    1.2101    1.3843    0.0000 C   0  0  0  0  0  0  0  0  0  0  0  0
    0.3897    1.2981    0.0000 C   0  0  0  0  0  0  0  0  0  0  0  0
    1.5457    2.1380    0.0000 C   0  0  0  0  0  0  0  0  0  0  0  0
    1.0608    2.8054    0.0000 C   0  0  0  0  0  0  0  0  0  0  0  0
    0.2403    2.7192    0.0000 C   0  0  0  0  0  0  0  0  0  0  0  0
   -0.0953    1.9655    0.0000 C   0  0  0  0  0  0  0  0  0  0  0  0
   -0.7305    1.1116    0.0000 C   0  0  0  0  0  0  0  0  0  0  0  0
   -0.7305   -1.3577    0.0000 C   0  0  0  0  0  0  0  0  0  0  0  0
   -3.0629    2.0208    0.0000 Br  0  0  0  0  0  0  0  0  0  0  0  0
    0.3081   -1.5724    0.0000 N   0  0  0  0  0  0  0  0  0  0  0  0
    1.0202   -1.9833    0.0000 C   0  0  0  0  0  0  0  0  0  0  0  0
    3.1559   -0.7496    0.0000 C   0  0  0  0  0  0  0  0  0  0  0  0
    2.4438   -0.3387    0.0000 C   0  0  0  0  0  0  0  0  0  0  0  0
    1.7319   -0.7499    0.0000 C   0  0  0  0  0  0  0  0  0  0  0  0
    1.7321   -1.5720    0.0000 C   0  0  0  0  0  0  0  0  0  0  0  0
    2.4442   -1.9829    0.0000 C   0  0  0  0  0  0  0  0  0  0  0  0
    3.1561   -1.5717    0.0000 C   0  0  0  0  0  0  0  0  0  0  0  0
    1.0204   -2.8054    0.0000 O   0  0  0  0  0  0  0  0  0  0  0  0
 10 24  1  0      
 24 25  1  0      
 31 26  2  0      
 26 27  1  0      
 27 28  2  0      
 28 29  1  0      
 29 30  2  0      
 31 30  1  0      
 29 25  1  0      
 25 32  2  0      
  1  2  2  0      
  2  3  1  0      
  3  4  2  0      
  4  5  1  0      
  5  6  2  0      
  6  1  1  0      
  4  7  1  0      
  7  8  1  0      
  8  9  1  0      
  9  5  1  0      
  8 10  1  0      
 10 11  1  0      
 11 12  2  0      
 12  9  1  0      
 11 13  1  0      
 13 14  2  0      
 14 15  1  0      
 15 16  2  0      
 16 12  1  0      
 15 17  1  0      
 17 18  2  0      
 18 19  1  0      
 19 20  2  0      
 20 16  1  0      
  9 21  1  6      
  8 22  1  6      
  1 23  1  0      
M  STY  1   1 SUP
M  SLB  1   1   1
M  SAL   1  9  24  25  26  27  28  29  30  31  32
M  SBL   1  1   1
M  SMT   1 NHBz
M  SBV   1   1   -0.2541    0.7819
M  END
